# Supplementary material for: Discovering lipid phenotypic changes of sepsis-induced lung injury using high-throughput lipidomic analysis
Source: Royal Society of Chemistry journal article supplement (doi:10.1039/c6ra03979k), 2016-01-01
Supplement: c6ra03979k1.pdf [file c6ra03979k1.pdf]

**Table S1.** Demographic and baseline characteristics of the subjects enrolled in the study.

| <b>Parameter</b>                 | <b>Patients (n = 80)</b> | <b>Healthy volunteers(n = 82)</b> | <b>P value</b> |
|----------------------------------|--------------------------|-----------------------------------|----------------|
| Age, years                       | 55±4                     | 53±5                              | 0.70           |
| Sex (male/female)                | 45/35                    | 44/38                             | 0.63           |
| APACHE II                        | 17.9±3.2                 | 8.31±2.09                         | 0.04           |
| SOFA-24h                         | 7.22±1.39                | 3.45±0.71                         | 0.03           |
| Hemoglobin (g/dl)                | 12.31±2.90               | 17.10±2.02                        | 0.09           |
| Leukocytes (x10 <sup>9</sup> /l) | 14.07±1.46               | 19.10±4.29                        | 0.03           |
| Platelets (x10 <sup>9</sup> /l)  | 184.8±32.02              | 250.3±48.83                       | 0.01           |
| PCT (ng/ml)                      | 2.5±0.3                  | 1.1±0.2                           | 0.02           |
| Urea (mg/dl)                     | 71±15                    | 52±10                             | 0.05           |

Note: APACHE II Acute Physiology and Chronic Health Evaluation II, SOFA Sequential Organ Failure Assessment, PCT procalcitonin.  
\*p values, survivor vs non-survivor; Values with p<0.05 represent a significant change.
